**Title:** Thalamic state influences timing precision in the thalamocortical circuit

**Abbreviated Title:** Thalamic state influences thalamocortical timing

**Authors:** Clarissa J Whitmire, Yi Juin Liew, Garrett B Stanley

**Affiliation:** Wallace H Coulter Department of Biomedical Engineering, Georgia Institute of Technology and Emory University, Atlanta, GA.

**Contact info:** Correspondence should be addressed to:  
Professor Garrett B. Stanley  
Coulter Department of Biomedical Engineering  
Georgia Institute of Technology & Emory University  
313 Ferst Drive  
Atlanta, GA 30332  
Phone: 404.385.5037  
Email: [garrett.stanley@bme.gatech.edu](mailto:garrett.stanley@bme.gatech.edu)

**Acknowledgements:** This work was supported by NIH National Institute of Neurological Disorders and Stroke Grants R01NS085447 and R01NS104928. CJW was supported by the NIH NRSA Pre-doctoral Fellowship (F31NS089412). Confocal imaging was performed at the Georgia Tech IBB Imaging Core. We thank Peter Y Borden, Aurélie Pala, Christian Waiblinger, and Caleb Wright for helpful comments on the data analysis and manuscript.

**Declaration of Interest:** The authors declare no competing financial interests.

**Number of Pages:** 40

**Number of Figures:** 5

**Number of Words – Abstract:** 248

1 **Abstract**

2 Sensory signals from the outside world are transduced at the periphery, passing through  
3 thalamus before reaching cortex, ultimately giving rise to the sensory representations that  
4 enable us to perceive the world. The thalamocortical circuit is particularly sensitive to the  
5 temporal precision of thalamic spiking due to highly convergent synaptic connectivity.  
6 Thalamic neurons can exhibit burst and tonic modes of firing that strongly influence timing  
7 within the thalamus. The impact of these changes in thalamic state on sensory encoding in  
8 the cortex, however, remains unclear. Here, we investigated the role of thalamic state on  
9 timing in the thalamocortical circuit of the vibrissa pathway in the anesthetized rat. We  
10 optogenetically hyperpolarized thalamus while recording single unit activity in both thalamus  
11 and cortex. Tonic spike triggered analysis revealed temporally precise thalamic spiking that  
12 was locked to white-noise sensory stimuli, while thalamic burst spiking was associated with a  
13 loss in stimulus-locked temporal precision. These thalamic state dependent changes  
14 propagated to cortex such that the cortical timing precision was diminished during the  
15 hyperpolarized (burst biased) thalamic state. While still sensory driven, the cortical neurons  
16 became significantly less precisely locked to the white-noise stimulus. The results here  
17 suggest that tonic thalamic spiking is more temporally precise than burst firing, which leads to  
18 distinct differences in sensory information representation at the level of both the thalamus and  
19 the cortex, as assessed using spike triggered analysis. This difference in spike timing precision  
20 enables a dynamic encoding scheme for sensory information as a function of thalamic state.

21 **New and Noteworthy**

22 The majority of sensory signals are transmitted through the thalamus. There is growing  
23 evidence of complex thalamic gating through coordinated firing modes that have a strong  
24 impact on cortical sensory representations. Optogenetic hyperpolarization of thalamus pushed  
25 it into burst firing that disrupted precise time-locked sensory signaling, with a direct impact on  
26 the downstream cortical encoding, setting the stage for a timing-based thalamic gate of  
27 sensory signaling.

## 28 **Introduction**

29           Sensory thalamus plays a critical role in gating information flow from sensors in the  
30 periphery to cortex, ultimately shaping how we perceive the world. Importantly, thalamic gating  
31 properties are not static, but instead vary dynamically through a range of modulatory  
32 mechanisms, including local membrane and synaptic properties (Wolfart et al., 2005), stimulus  
33 history (Whitmire et al., 2016), and neuromodulatory inputs (Castro-alamancos, 2002; Mease  
34 et al., 2014). Although arising from different mechanisms, these modulatory inputs have the  
35 net effect of altering the baseline membrane polarization level in the thalamus, referred to here  
36 as “thalamic state”, which plays an important role in determining the encoding properties of  
37 the thalamic neurons that serve as primary inputs to sensory cortex. Perhaps most  
38 prominently, modulation of the baseline membrane potential in thalamic neurons enables  
39 distinct tonic and burst firing modes due to the selective engagement of low threshold calcium  
40 channels during prolonged hyperpolarization (Suzuki and Rogawski, 1989). It has long been  
41 posited that these two firing modes could dynamically control information processing  
42 (Sherman 2001), but the precise way in which this could happen has remained speculative  
43 and the way in which cortical coding properties are shaped is unknown.

44           Although the large majority of studies of T-type calcium channel bursts in thalamus  
45 have been focused on the underlying detailed biophysical mechanisms enabled by brain slice  
46 recordings, there have been a number of investigations of the intact circuitry in-vivo. At the  
47 thalamocortical synapse, in-vivo studies have shown that spontaneous burst spikes are more  
48 effective at driving cortical spiking (Swadlow and Gusev, 2001) and evoke larger cortical  
49 depolarizations (Bruno and Sakmann, 2006) than tonic spikes. The in-vivo properties of burst  
50 and tonic spiking have been explored perhaps most extensively in the visual pathway (Alitto  
51 et al., 2005; Denning and Reinagel, 2005; Lesica and Stanley, 2004; Reinagel et al., 1999;  
52 Wang et al., 2007), with burst firing shown to be reliably elicited across trials in response to  
53 visual stimulation (Lesica and Stanley, 2004; Martinez-Conde et al., 2002; Wang et al., 2007),  
54 associated with an “all-or-none” type of response to facilitates detection of changes in the  
55 visual scene (Lesica and Stanley, 2004) consistent with mechanisms that would serve as a

56 “wake-up call” to cortex (Sherman, 2001). Furthermore, although historically controversial, it  
57 has been shown in a number of studies that thalamic bursting is not just observed in sleep  
58 states or under anesthesia, but is present, albeit reduced, in the awake brain (Borden et al.,  
59 2019; Guido and Weyand, 1995; Whitmire et al., 2016). However, the implication for  
60 downstream cortical encoding remains elusive because of the complexity of the  
61 thalamocortical circuitry. It has been estimated that 50-100 thalamic neurons converge as the  
62 primary drivers of a single cortical neuron (Bruno and Sakmann, 2006), where the concerted  
63 effort of a relatively large number of synaptic inputs is needed to drive suprathreshold cortical  
64 activity. Without a mechanism to manipulate the population activity of thalamic neurons  
65 converging on a common cortical target independent of the sensory drive, the role of  
66 tonic/burst firing in driving downstream cortical activity remains elusive.

67 To address this, we used optogenetic manipulation of thalamic state to systematically  
68 bias the thalamic population towards a burst firing regime to quantify the role of thalamic state  
69 on precise timing of spiking activity in the thalamocortical circuit of the rodent whisker pathway  
70 using a two-stage, linear-nonlinear framework. The first stage represents the sensory feature  
71 selectivity, and the second stage represents the overall sensitivity of the input-output  
72 relationship (Estebanez et al., 2012; Petersen et al., 2008; Ramirez et al., 2014). This  
73 characterization was performed for neurons recorded extracellularly in the ventro posterior-  
74 medial (VPM) thalamus and in primary somatosensory cortex (S1) in the fentanyl-anesthetized  
75 rat, for both first order (spike-triggered average) and higher order (spike-triggered covariance)  
76 selectivity. For thalamic neurons, we found that tonic spiking was associated with whisker-  
77 stimulus feature selectivity consistent with previous findings (Petersen et al., 2008). However,  
78 analysis of burst firing suggested that while bursting activity was clearly sensory driven, the  
79 spike-triggered analysis revealed a lack of precise stimulus-locked spiking in response to  
80 white-noise whisker stimulation. This was further confirmed using optogenetic  
81 hyperpolarization of VPM to switch the thalamus into a burst mode. In the cortical neurons,  
82 when the thalamus was dominated by tonic firing, the cortical neurons exhibited similar feature  
83 selectivity as observed in VPM. However, when the thalamus was optogenetically

84 hyperpolarized, the spike-triggered analysis revealed a reduction in precise stimulus-locked  
85 spiking in S1 units in response to the white-noise whisker stimulus, yet maintained a consistent  
86 overall stimulus-driven firing rate. Given the sensitivity of the cortex to precise timing of  
87 thalamic projection neurons, these results suggest that shifts in thalamic state disrupt precise  
88 timing of thalamic inputs to cortex that are compensated for by the potency of the thalamic  
89 bursts, setting the stage for a timing-based gating of information flow to cortex.

## 90 **Methods**

### 91 **Experimental Procedures**

92 **Acute Surgery:** All procedures were approved by the Georgia Institute of Technology  
93 Institutional Animal Care and Use Committee and were in agreement with guidelines  
94 established by the National Institutes of Health. 19 female albino rats (Sprague-Dawley, 250-  
95 300g) were anesthetized intravenously using a fentanyl cocktail (fentanyl (5 µg/kg), midazolam  
96 (2 mg/kg), dexmedetomidine (150 µg/kg)). A craniotomy was performed over VPm (2-4 mm  
97 caudal to bregma, 1.5-3.5 mm lateral to the midline), and in a subset of animals, a second  
98 craniotomy was performed over S1 (1-3 mm caudal to bregma, 4.5-6 mm lateral to the  
99 midline). At the termination of the experiment, the animal was euthanized with an overdose of  
100 sodium pentobarbital (euthasol, 0.5 mL at 390 mg/mL). All optogenetically transfected animals  
101 that underwent cortical probe recordings were perfused and their brains were imaged for  
102 verification of opsin location and cortical probe location.

103 **Electrophysiology:** Tungsten microelectrodes were lowered into the thalamus (depth: 4.5-6  
104 mm) using a micropositioner (Kopf, Luigs-Neumann). Multielectrode probes (A1x32-10mm-  
105 50-177, NeuroNexus) were lowered perpendicular to S1 (45° relative to vertical; depth: 2 mm).  
106 The topographic location of the electrode was identified through manual stimulation of the  
107 whisker pad. Upon identification of the primary whisker for the recorded unit(s), the primary  
108 whisker was threaded into the galvo motor to permit stimulation of a single whisker.

109 **Sensory Stimulus:** Mechanical whisker stimulation was delivered using a precisely controlled  
110 galvo motor (Cambridge Technologies, custom Matlab software). The mechanical stimulus  
111 applied to the whisker in the rostral-caudal direction consisted of sensory white-noise (low  
112 pass filtered at 200 Hz, standard deviation of the noise was 0.6° or 223°/s). Feedback from  
113 the whisker stimulator were used for further spike triggered analysis across all units (down  
114 sampled to 4.88 kHz).

115 **Optogenetics surgeries:** All surgical procedures followed sterile protocol. A small craniotomy  
116 was made above VPM (3 mm lateral, 3 mm caudal to bregma). A 10  $\mu$ L syringe (Neuros  
117 Syringe, Hamilton, Inc) filled with the virus (rAAV5-CamKIIa-Jaws-KGC-GFP-ER2 or rAAV5-  
118 CamKIIa-eNpHR3.0-EYFP, UNC Viral Vector Core Services) was lowered to depth of 5.2 mm  
119 before injecting 1  $\mu$ L of virus at a rate of 0.2  $\mu$ L/min (iSi system, Stoelting). The syringe  
120 remained in place for five minutes after the injection was complete to allow the virus to diffuse.  
121 Opsin expression was fully realized at 2-3 weeks post-surgery.

122 **Optogenetic Stimulus:** Optical manipulation was administered with a controlled pulse of light  
123 through a custom optrode consisting of an optical fiber (200 $\mu$ m diameter; Thorlabs) and an  
124 electrode (Tungsten microelectrode; FHC) that was lowered into the VPM. Upon identifying a  
125 whisker sensitive cell, light sensitivity was assessed by the post-inhibitory rebound spiking  
126 response using a train of 250 millisecond light pulses ( $\lambda$  = 590 or 617nm for Halorhodopsin  
127 and Jaws, respectively). The whisker was then stimulated without (baseline) and with  
128 (hyperpolarized) light provided directly to the thalamus (50 mW/mm<sup>2</sup>). Optogenetic stimulus  
129 conditions (light on/hyperpolarized, light off/baseline) were interleaved to avoid long-term  
130 adaptation effects.

131 **Analytical Methods:** Spike sorting for single channel recordings was performed online and  
132 validated offline using Waveclus (Quiroga et al., 2004). Spike sorting for multichannel  
133 electrodes was performed offline using the KlustaKwik software suite (Rossant et al., 2015).  
134 Isolation of the unit was confirmed by the waveform amplitude (absolute and relative to the  
135 background noise  $>3$ ) and the interspike-interval distributions (VPM: mean of 0.22%, S1:  
136 mean of 0.38% of spikes in absolute refractory period of 1ms).

137 Although spike-triggered analysis for exploration of feature selectivity has been utilized widely  
138 in the thalamocortical circuit of the visual (Butts et al., 2007; Jones and Palmer, 1987; Lesica  
139 and Stanley, 2004; Reid and Alonso, 1995) and auditory (Eggermont et al., 1983; Theunissen  
140 et al., 2000) pathway, the application of this approach in the somatosensory pathway has



141 been limited to a fairly small number of studies across thalamus (Petersen et al., 2008) and  
142 cortex (Estebanez et al., 2012; Maravall et al., 2007; Ramirez et al., 2014). Here we  
143 implemented spike-triggered analysis across VPM thalamus and S1 cortical layer 4.  
144 Specifically, feature selectivity was first estimated for each recorded unit using a simple spike  
145 triggered average (STA) (Schwartz et al., 2006).

146

$$STA = \frac{1}{N} \sum_j s(t_j)$$

147 Where N is the number of spikes and  $s$  is the stimulus segment in a window surrounding each  
148 spike (-30 to +5 ms, spike-triggered ensemble). The burst and tonic triggered averages were  
149 computed from burst and tonic spikes, respectively. Burst spikes were classified here from the  
150 extracellular recordings as two or more spikes with an inter-spike interval of less than four  
151 milliseconds with the first spike in the burst preceded by 100 milliseconds of silence. The  
152 baseline/hyperpolarized condition triggered averages were computed from all spikes in a  
153 given stimulus condition. The bootstrap estimate of the confidence intervals on the spike  
154 triggered average was computed as the +/- 2 standard deviation of the shuffled STA  
155 distribution across 500 repetitions (Schwartz et al., 2006). Note that we implemented multiple  
156 techniques of estimating the feature selectivity of the neurons including spike triggered  
157 covariance, generalized linear models, and nonlinear-input models (McFarland et al., 2013).  
158 The results were qualitatively consistent across all methods employed, so we chose to use  
159 spike triggered average throughout the manuscript due to its simplicity.

160 The signal-to-noise ratio of the recovered STA was quantified as the peak-to-peak amplitude  
161 of the STA within 10 milliseconds of the spike (where the significant filter activity is contained)  
162 divided by the peak-to-peak amplitude of the STA from 30 to 20 milliseconds before the spike  
163 (where there is no expected filter information). An SNR value of 1 means the amplitude of the  
164 STA near the spike time is not different from the amplitude of the noise fluctuations. Therefore,  
165 any units with an SNR value less than 2 were excluded from further analysis.

166 There was significant diversity in the resultant STA structure across recorded neurons.  
167 Utilizing the approach of Estebanez et al. to make comparisons of the feature selectivity across  
168 the population of recorded neurons, we conducted a principle components analysis of the  
169 recovered STA (Estebanez et al., 2012). The first two principle components accounted for the  
170 majority of the variance (71.8% VPM, 78.4% S1), and were interpreted as representative of  
171 the primary structure in the sensory input relevant for spiking in the population.

172 The STA represents structure in the sensory input that is captured in the mean across spiking  
173 activity, and cannot capture any structure that may be in higher order statistical properties of  
174 the stimulus. Spike-triggered covariance (STC) can also be calculated as an alternative, as  
175 an attempt to uncover high-order structure in the sensory stimulus that is associated with  
176 neuronal firing (Estebanez et al., 2012). Note that while implemented in this analysis, STC  
177 analysis of both VPM and S1 neurons did not reveal significantly different structure for the  
178 neurons recorded under our experimental conditions, and are thus not shown here, and even  
179 more importantly, this analysis did not reveal a shift in feature selectivity across thalamic  
180 states.

181 The non-linearity ( $P(\text{spike}|y)$ ) was estimated as the ratio of the probability of spike-triggered  
182 stimuli ( $P(y|\text{spike})$ ) to the probability of any stimulus segment in the stimulus ( $P(y)$ ) multiplied  
183 by the mean firing rate of the neuron ( $P(\text{spike})$ ) (Schwartz et al., 2006):

$$184 \quad p(\text{spike}|y) = p(\text{spike}) \frac{p(y|\text{spike})}{p(y)}$$

185 Where  $y$  is defined as the stimulus ( $s$ ) convolved with the feature selectivity of the unit (STA)  
186 (Lesica et al., 2007), referred to as filtered stimulus. Because the slope of the static non-  
187 linearity is determined by the separation between the spike triggered ensemble and the  
188 Gaussian distributed white-noise, as the spike triggered ensemble distribution becomes more  
189 selective (i.e. the mean moves away from the filtered stimulus distribution), the separability of  
190 the distributions increases, and the slope of the non-linearity also increases. Intuitively, this

191 means that the shape of the non-linearity gives an estimate of the separability of the spike  
192 triggered ensemble and the stimulus distribution, or how strongly tuned a neuron is for that  
193 particular feature, given by the STA. A steeper slope in the non-linearity suggests a stronger  
194 tuning than a shallower slope. Therefore, we also assessed the spiking nonlinearity as a  
195 function of the spike classification. For all conditions, the best estimate of the STA was defined  
196 as tonic spike triggered average for thalamic units and the baseline thalamic state (i.e. not  
197 optogenetically manipulated) for the cortical units. Throughout the manuscript, we separate  
198 the firing rate ( $p(\text{spike})$ ) from the shape of the non-linearity ( $p(y|\text{spike})/p(y)$ ) to avoid  
199 confounding differences in firing rate with differences in tuning.

200 The precision in the noise evoked firing was estimated for each spike classification (tonic,  
201 burst, baseline, hyperpolarized). The precision was defined as:

$$202 \quad \textit{precision} = \frac{\sum_{-1}^{+1} \tau_{\textit{jitter}}}{\sum_{-\infty}^{\infty} \tau_{\textit{jitter}}}$$

203 Or the number of spikes with  $\tau_{\textit{jitter}}$  values of +/- 1 ms duration normalized by the total number  
204 of spikes.  $\tau_{\textit{jitter}}$  is defined for each spike as the temporal lag ( $t_{\textit{lag}}$ ) for the peak correlation  
205 between the STA and the stimulus segment surrounding that spike (-30 ms to +5 ms).

$$206 \quad \tau_{\textit{jitter}} = \arg \max_{t_{\textit{lag}}} \textit{correlation}(\textit{STA}, s(t_j))$$

207 The  $\tau_{\textit{jitter}}$  distribution was normalized by the total number of spikes in each condition (tonic,  
208 burst, baseline, hyperpolarized).

209 All pairwise statistical comparisons were computed using a Wilcoxon signed rank test unless  
210 otherwise noted.

## 211 **Results**

### 212 Spike triggered analysis in the thalamus and cortex

213 We recorded thalamic and cortical extracellular spiking activity in response to sensory  
214 white-noise stimulation of a single whisker in the vibrissa pathway of the fentanyl-cocktail  
215 anesthetized rat to enable long-duration, controlled measurements needed for precise  
216 estimates of feature selectivity (Figure 1A, see Methods). We estimated the feature selectivity  
217 for each unit as the spike triggered average (STA), which captures the features of the sensory  
218 stimulus that tended to precede spiking, and the static, point nonlinearity, which captures the  
219 translation into suprathreshold spiking activity (Figure 1B; see methods). Although this  
220 quantification was performed on longer unique noise segments, we also recorded the  
221 response to short (4-10 second) frozen white-noise segments to examine the response across  
222 trials. Figure 1C shows an example recording from a simultaneously recorded pair of neurons  
223 in topographically aligned regions of the thalamus (left column, ventral posteromedial nucleus,  
224 VPM) and cortex (right column, primary somatosensory cortex, S1) in response to the  
225 repeated presentation of a single frozen white-noise segment (top of each column). Across  
226 trials, the repeatability of the response to the noise stimulus is apparent in the raster plot, with  
227 clear vertical patterns across trials. Spike-triggered analysis has been widely utilized in  
228 studying feature selectivity in the visual (Butts et al., 2007; Jones and Palmer, 1987; Lesica  
229 and Stanley, 2004; Reid and Alonso, 1995) and auditory (Eggermont et al., 1983; Theunissen  
230 et al., 2000) pathway, but has been utilized in the somatosensory pathway in only a relatively  
231 small number of studies (Estebanez et al., 2012; Maravall et al., 2007; Petersen et al., 2008;  
232 Ramirez et al., 2014). Here, to explore the feature selectivity of these recorded neurons, the  
233 spike-triggered average (STA) was computed for the thalamic and cortical unit for stimulus  
234 segments from -30 milliseconds prior to the spike to +5 milliseconds afterwards at a 0.2ms  
235 resolution (Figure 1C, bottom). The VPM STA shows clear feature selectivity in the 10-15  
236 milliseconds prior to the thalamic spike as evidenced by the large amplitude of the STA relative  
237 to the shuffled case (grey confidence intervals). Beyond 15 milliseconds prior to the spike, the

238 VPM STA is essentially flat and within the confidence bounds on the shuffled process. This  
239 suggests that, on average, the thalamic unit is only sensitive to the stimulus occurring in the  
240 previous 10-15 milliseconds. The S1 unit also displays feature selectivity as evidenced by the  
241 shape and amplitude of the S1 STA immediately prior to the cortical spike relative to the  
242 shuffled case. Although the VPM STA is nearly ten times as large in amplitude as the S1 STA,  
243 the similarity in the temporal dynamics can be visualized by shifting the VPM STA by 2  
244 milliseconds relative to the S1 STA (Figure 1C, bottom, S1 STA black, VPM STA shifted by 2  
245 milliseconds and scaled by a factor of 0.1 as grey dashed line).

246         While this simple comparison provides an interesting observation for a single pair of  
247 topographically aligned neurons, we also made comparisons of the feature selectivity across  
248 the population of recorded STAs for thalamus and cortex. First, we visualized the shape of the  
249 spike triggered average for a sample of example thalamic (Figure 1D left; greyscale) and  
250 cortical (Figure 1D right; greyscale) units. These STA filters cannot be simply averaged  
251 together to give an estimate of the population filter due to differences in the phase and  
252 directionality of the recovered STA across different recorded units. Instead, utilizing an  
253 approach from Estebanez et al., we performed a principle component analysis on the set of  
254 recovered thalamic and cortical STA filters across recordings to identify salient filter properties  
255 that generalized (Figure 1E, Estebanez et al., 2012). The first two principle components for  
256 the spike triggered averages of both thalamus and cortex explain the majority of the variance  
257 for the set of recovered filters, similar to what has been seen previously for cortex (Estebanez  
258 et al., 2012). Furthermore, a simple time shift of 2.5 milliseconds for the VPM principle  
259 components relative to the S1 principle components (Figure 1F, dashed lines) demonstrates  
260 the similarity in the STA subspace spanned by these principle components. It seems that  
261 despite not necessarily being recorded simultaneously or even in the same animal, there is a  
262 high degree of overlap in the low dimensional subspace of feature selectivity for  
263 thalamocortical neurons in the whisker pathway. Note that we further analyzed the spike  
264 triggered covariance (STC) for the same data and found that the subspace spanned by the

265 recovered linear filters matched the subspace estimated using the linear filters recovered  
 266 using STA, thus not revealing any higher-order feature selectivity in the data.

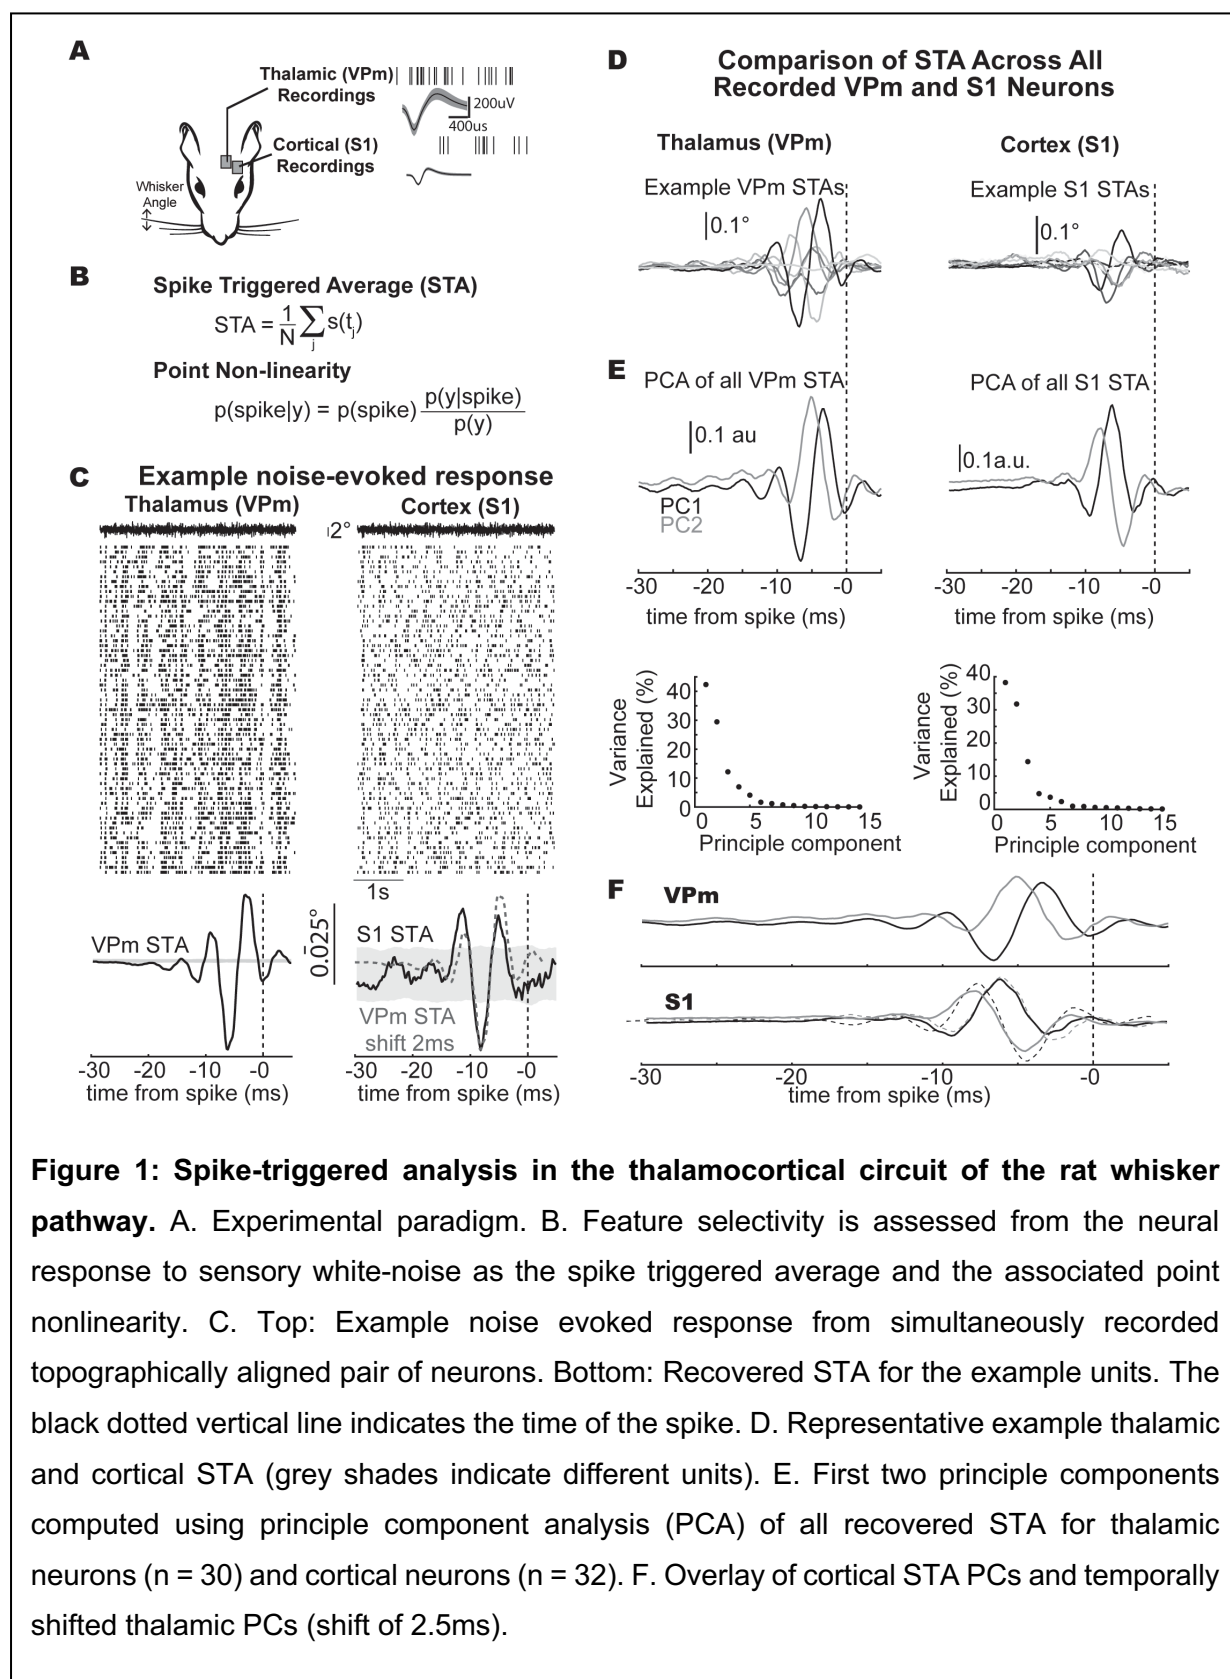

**Figure 1: Spike-triggered analysis in the thalamocortical circuit of the rat whisker pathway.** A. Experimental paradigm. B. Feature selectivity is assessed from the neural response to sensory white-noise as the spike triggered average and the associated point nonlinearity. C. Top: Example noise evoked response from simultaneously recorded topographically aligned pair of neurons. Bottom: Recovered STA for the example units. The black dotted vertical line indicates the time of the spike. D. Representative example thalamic and cortical STA (grey shades indicate different units). E. First two principle components computed using principle component analysis (PCA) of all recovered STA for thalamic neurons ( $n = 30$ ) and cortical neurons ( $n = 32$ ). F. Overlay of cortical STA PCs and temporally shifted thalamic PCs (shift of 2.5ms).

## 267 Tonic and burst spike triggered analysis in thalamus

268 Inherent in the spike triggered analysis, however, is an assumption that the average  
269 filter is representative of the sensory stimulus preceding all spikes (Stanley, 2002). Yet  
270 neurons in the thalamus are well known for exhibiting two fundamentally different types of  
271 firing: tonic spiking and burst firing mediated through T-type calcium channels (Suzuki and  
272 Rogawski, 1989). Burst spikes were classified here from the extracellular recordings as two  
273 or more spikes with an inter-spike interval of less than four milliseconds with the first spike in  
274 the burst preceded by 100 milliseconds of silence (Figure 2A, see methods). Using this  
275 classification, we asked if or how the feature selectivity of an individual thalamic unit changes  
276 as a function of the spiking mechanism in the whisker pathway.

277 In the thalamic recordings, tonic and burst spikes were interspersed throughout most  
278 of the recordings. For the example thalamic unit presented in Figure 1B, we computed the  
279 spike triggered average from all spikes (STA), the tonic spike triggered average from only tonic  
280 spikes (tSTA), and the burst spike triggered average from only spikes that are classified as  
281 being part of a burst (bSTA) (Figure 2B). The tSTA (grey) closely resembles the STA  
282 computed from all spikes (black) while the bSTA (red) is significantly degraded as evidenced  
283 by the flat shape of the filter. To compare the difference between burst and tonic feature  
284 selectivity across thalamic units, we quantified the signal-to-noise ratio of the STA ( $STA_{SNR}$ ,  
285 see methods). Across all thalamic units, the  $STA_{SNR}$  was higher for tonic spikes ( $tSTA_{SNR}$ ) than  
286 for burst spikes ( $bSTA_{SNR}$ ) (Figure 2C). Note that again we calculated the STC under these  
287 conditions and found the same result that the  $STC_{SNR}$  was higher for tonic spikes than for burst  
288 spikes ( $p = 2e-4$ ), and that there was not a fundamental shift in representation between tonic  
289 and burst spiking.

290 If the timing of spikes within a burst is not repeatable and structured, the presence of  
291 these additional spikes will serve to destroy the temporal structure in the feature selectivity as  
292 revealed by the spike triggered analysis. When the bSTA was computed from only the first  
293 spike in each burst (Figure 2B, red-dashed line), there was no apparent feature selectivity for



294 this example unit. This can also be visualized across units in the  $STA_{SNR}$  where the  $bSTA_{SNR}$   
295 is plotted when computed from all burst spikes (black dot) and when computed from the first  
296 spike in each burst (red circle, Figure 2C). Therefore, including all spikes in a burst (or not)  
297 does not strongly impact the ability to estimate the feature selectivity from the STA.

298         Given the estimated feature selectivity, we can compute the static non-linearity, or the  
299 input-output function, which provides a mapping between this filtered stimulus ( $y$ ) and the  
300 spiking response of the neuron ( $p(\text{spike}|y)$ ) by taking the ratio of the  $p(y|\text{spike})$  to the  $p(y)$   
301 (Figure 1B, see methods). Here, we used the tSTA as the filter for all spiking conditions when  
302 estimating the non-linearity. The probability of the filtered stimulus ( $p(y)$ ) remains unchanged  
303 when the filter is held constant. Therefore, any change in the non-linearity is then only due to  
304 changes in the probability of the filtered stimulus given that a spike occurred ( $p(y|\text{spike})$ ), or  
305 the spike triggered ensemble. In this example unit, we found that the tonic spikes were well  
306 tuned to the STA, as evidenced by the steep slope of the non-linearity while the burst spikes  
307 were not well tuned to the STA, as evidenced by the relatively flat non-linearity (Figure 2D).  
308 This trend was consistent across units where the burst spikes showed reduced tuning to the  
309 STA as compared to tonic spikes as assessed by the slope of the spiking nonlinearity (Figure  
310 2E). Here, we have separated the difference in the slope of the non-linearity from the  
311 difference in the prevalence of burst and tonic spikes ( $p(\text{spike})$  or firing rate), which is markedly  
312 higher for tonic spikes than for burst spikes (Figure 2F). Furthermore, we tested alternative  
313 burst spike classifications and quantified the implication for the STA (Figure 2G, top). Across  
314 spiking classifications, increased periods of silence prior to the spike ( $t_{\text{silence}}$ ) led to decreased  
315  $STA_{SNR}$  while bursts of spikes ( $t_{\text{isi}} < 4$  or  $< 10$ ) had consistently lower  $STA_{SNR}$  relative to tonic  
316 spikes ( $t_{\text{isi}} > 20$ ) (Figure 2G, example unit in middle, population data in bottom). This suggests  
317 that any tonic spiking incorrectly classified as part of a burst would serve to increase the  
318 amplitude, and thus the SNR, of the burst-triggered average, but the conservative definition of  
319 a burst pattern that we have used here likely minimizes this effect. Therefore, our data  
320 suggests a reduction in stimulus selectivity for burst spiking perhaps not due to a true loss of



321 feature selectivity but instead due to the analytical framework which requires neurons having  
322 a high temporal precision relative to the timescale of the stimulus features.

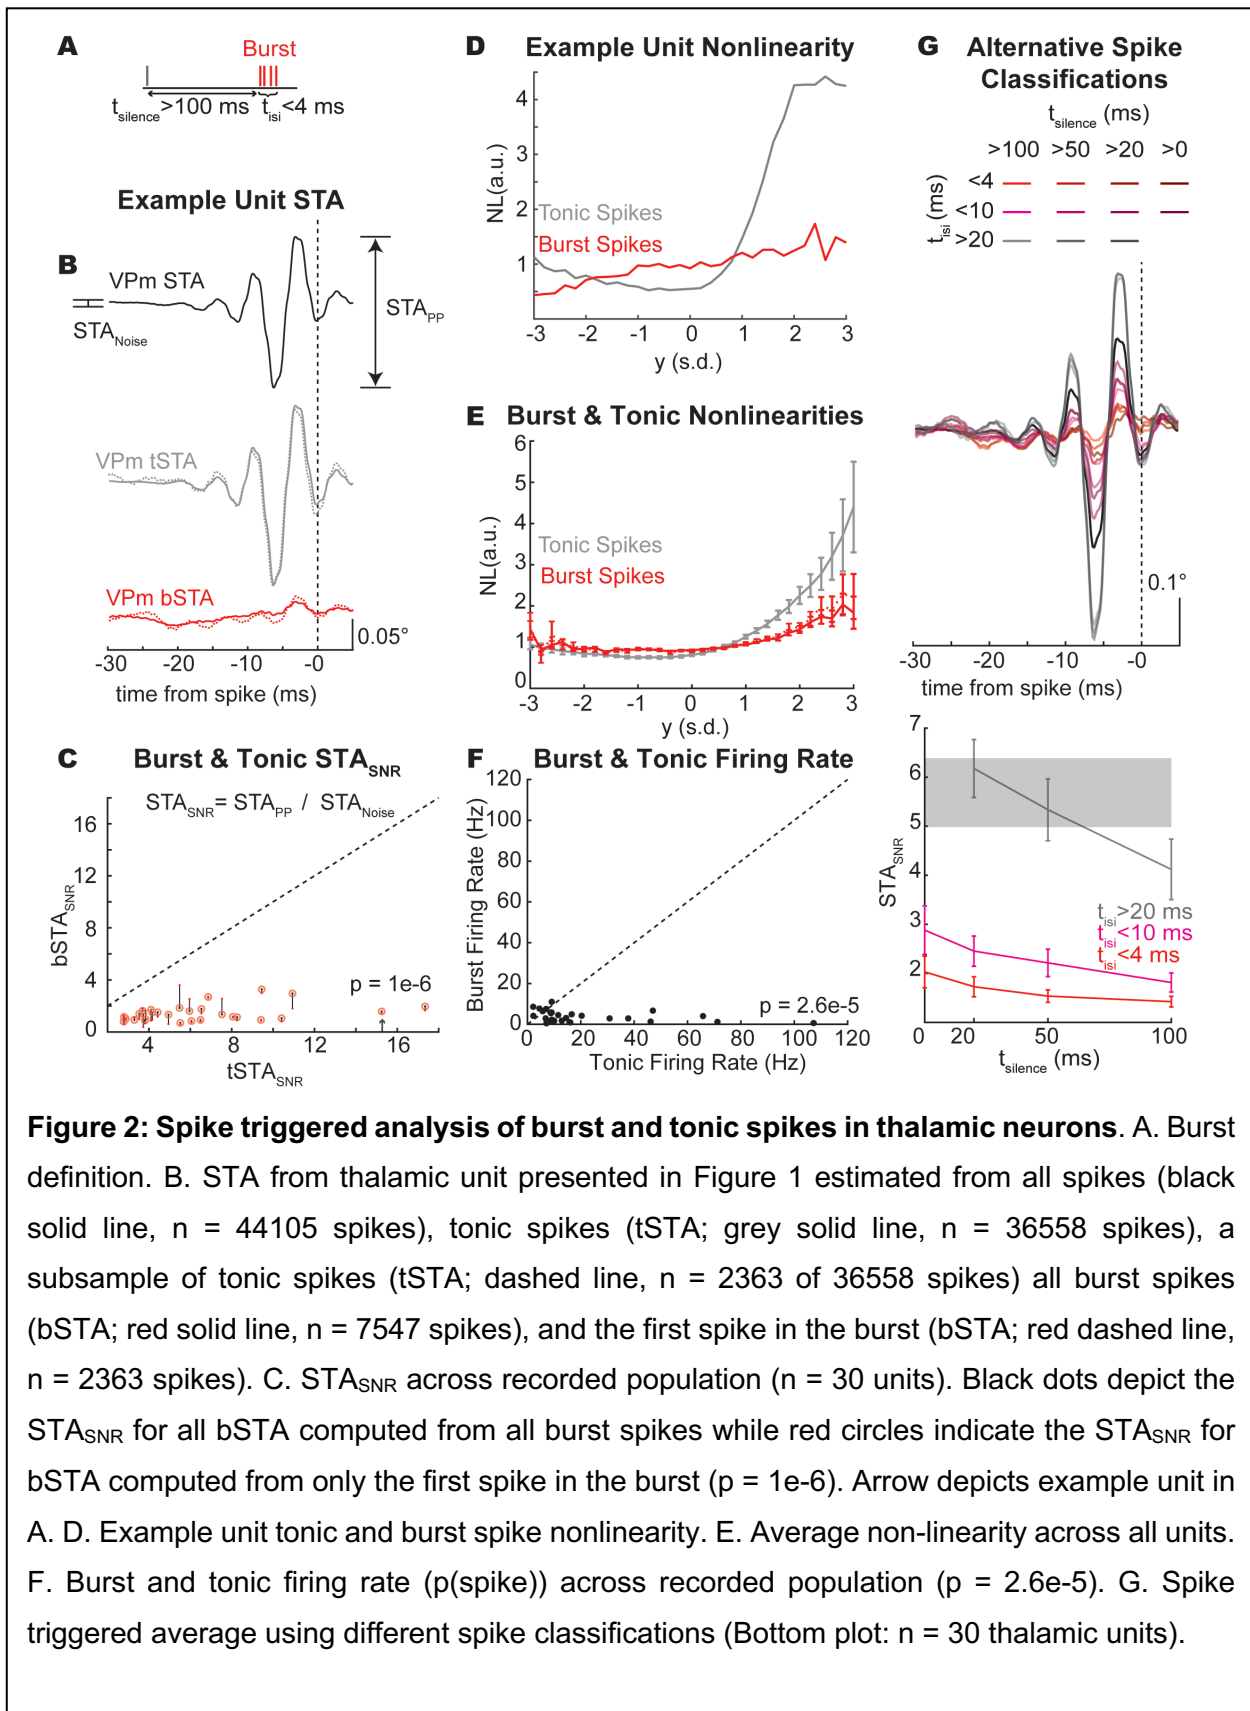

**Figure 2: Spike triggered analysis of burst and tonic spikes in thalamic neurons.** A. Burst definition. B. STA from thalamic unit presented in Figure 1 estimated from all spikes (black solid line,  $n = 44105$  spikes), tonic spikes (tSTA; grey solid line,  $n = 36558$  spikes), a subsample of tonic spikes (tSTA; dashed line,  $n = 2363$  of  $36558$  spikes) all burst spikes (bSTA; red solid line,  $n = 7547$  spikes), and the first spike in the burst (bSTA; red dashed line,  $n = 2363$  spikes). C.  $STA_{\text{SNR}}$  across recorded population ( $n = 30$  units). Black dots depict the  $STA_{\text{SNR}}$  for all bSTA computed from all burst spikes while red circles indicate the  $STA_{\text{SNR}}$  for bSTA computed from only the first spike in the burst ( $p = 1e-6$ ). Arrow depicts example unit in A. D. Example unit tonic and burst spike nonlinearity. E. Average non-linearity across all units. F. Burst and tonic firing rate ( $p(\text{spike})$ ) across recorded population ( $p = 2.6e-5$ ). G. Spike triggered average using different spike classifications (Bottom plot:  $n = 30$  thalamic units).

## 324 Optogenetic manipulation of thalamic state

325           The previous analysis was conducted by presenting sensory white-noise stimuli and  
326 parsing measured thalamic spiking activity into tonic and burst classes, while these classes of  
327 spiking were intermingled throughout the recordings. However, the thalamus was in tonic firing  
328 mode, with relatively low burst firing rates (Figure 2F). Here, we used optogenetic  
329 hyperpolarization of the thalamic neurons not to silence the thalamic neurons, but instead to  
330 shift the thalamus into a burst firing mode during sensory white-noise stimulation (Figure 3A).  
331 Using this optogenetic manipulation, we asked whether the optogenetically manipulated firing  
332 mode (baseline and hyperpolarized conditions) of the thalamus impacts encoding and how  
333 this relates to the classified burst/tonic modes.

334           Here, we recorded the thalamic response to sensory white-noise with and without the  
335 presence of a light stimulus (hyperpolarized and baseline conditions, respectively). We found  
336 no significant change in the thalamic firing rate between hyperpolarized and baseline  
337 conditions (Figure 3B), but the firing mode of the thalamus did shift towards burst firing  
338 (baseline burst ratio =  $0.16 \pm 0.15$ , hyperpolarized burst ratio =  $0.36 \pm 0.27$ ,  $n = 10$  units, Figure  
339 3C). Interestingly, the mean firing rate in VPM in response to sensory white-noise was not  
340 significantly different between the baseline and hyperpolarized conditions, reflecting a  
341 “replacement” of tonic firing with burst firing. It is also apparent that the bursts in the baseline  
342 and hyperpolarized conditions are not occurring at similar times, despite a common sensory  
343 drive, suggesting some differences in the stimulus properties to which the bursts are sensitive  
344 across the two conditions. Bursts in the hyperpolarized condition showed a similar number of  
345 spikes per burst (Figure 3D) with a shorter inter-spike interval within a burst (Figure 3E). For  
346 an example unit, we have plotted the spiking response to a frozen white-noise segment without  
347 optogenetic stimulation (Figure 3F, baseline condition) and with optogenetic stimulation  
348 (Figure 3F, hyperpolarized condition). We have pseudo-colored the tonic spikes grey and the  
349 burst spikes red to qualitatively visualize the thalamic firing mode (Figure 3F). In the baseline  
350 condition, the response is primarily tonic as evidenced by the grey raster plots (Figure 3F,

351 Baseline, BR = 0.10). In the hyperpolarized condition (optically stimulated), the firing mode is  
352 biased towards a burst encoding scheme, as evidenced by the prevalence of red burst spikes  
353 (Figure 3F, Hyperpolarized, BR = 0.67). The tonic STA showed pronounced feature selectivity  
354 for this unit while the burst STA did not (Figure 3G top), consistent with the earlier findings  
355 reflective of the loss in timing precision for the first spike of a burst (Figure 2). In the  
356 optogenetically manipulated states, the baseline STA has prominent feature selectivity while  
357 the hyperpolarized condition is much smaller in amplitude (Figure 3G bottom). Qualitatively,  
358 we can see that the STA from the hyperpolarized condition reflected the STA obtained from  
359 the burst spiking in the previous analysis. Again, a subsequent analysis of the STC revealed  
360 representations that were redundant with the spike-triggered average, and no apparent shift  
361 in feature selectivity between the tonic and burst firing modes.

362         The similarity between the burst spike response and hyperpolarized condition can also  
363 be seen in this example nonlinearity where the burst and hyperpolarized nonlinearities are  
364 effectively flat while the tonic spikes and baseline condition show obvious tuning (Figure 3H).  
365 Across units, we found an overall reduction in the  $STA_{SNR}$  for the hyperpolarized condition  
366 relative to the baseline condition (Figure 3I,  $p = 0.037$ ). We also found that the tuning of the  
367 nonlinearity was lower for the hyperpolarized condition relative to the baseline condition as  
368 reflected in the overall gain/slope (Figure 3J). Importantly, the baseline and hyperpolarized  
369 conditions both contain burst and tonic spikes. Instead of completely separating the firing  
370 modes into all burst spikes or all tonic spikes, we have optogenetically altered the spiking  
371 probabilities such that the baseline condition has more tonic spikes and the hyperpolarized  
372 condition has more burst spikes (Figure 3C) while maintaining similar numbers of spikes  
373 (Figure 3B). The similarities between the STA and the NL properties of the burst and  
374 hyperpolarized state as well as the tonic and baseline state suggest that there was no  
375 discernable difference for the estimation of feature selectivity when assessed based on the  
376 state of the thalamus at the time of the stimulus (hyperpolarized/baseline) versus the spike  
377 type classification (burst/tonic).

378

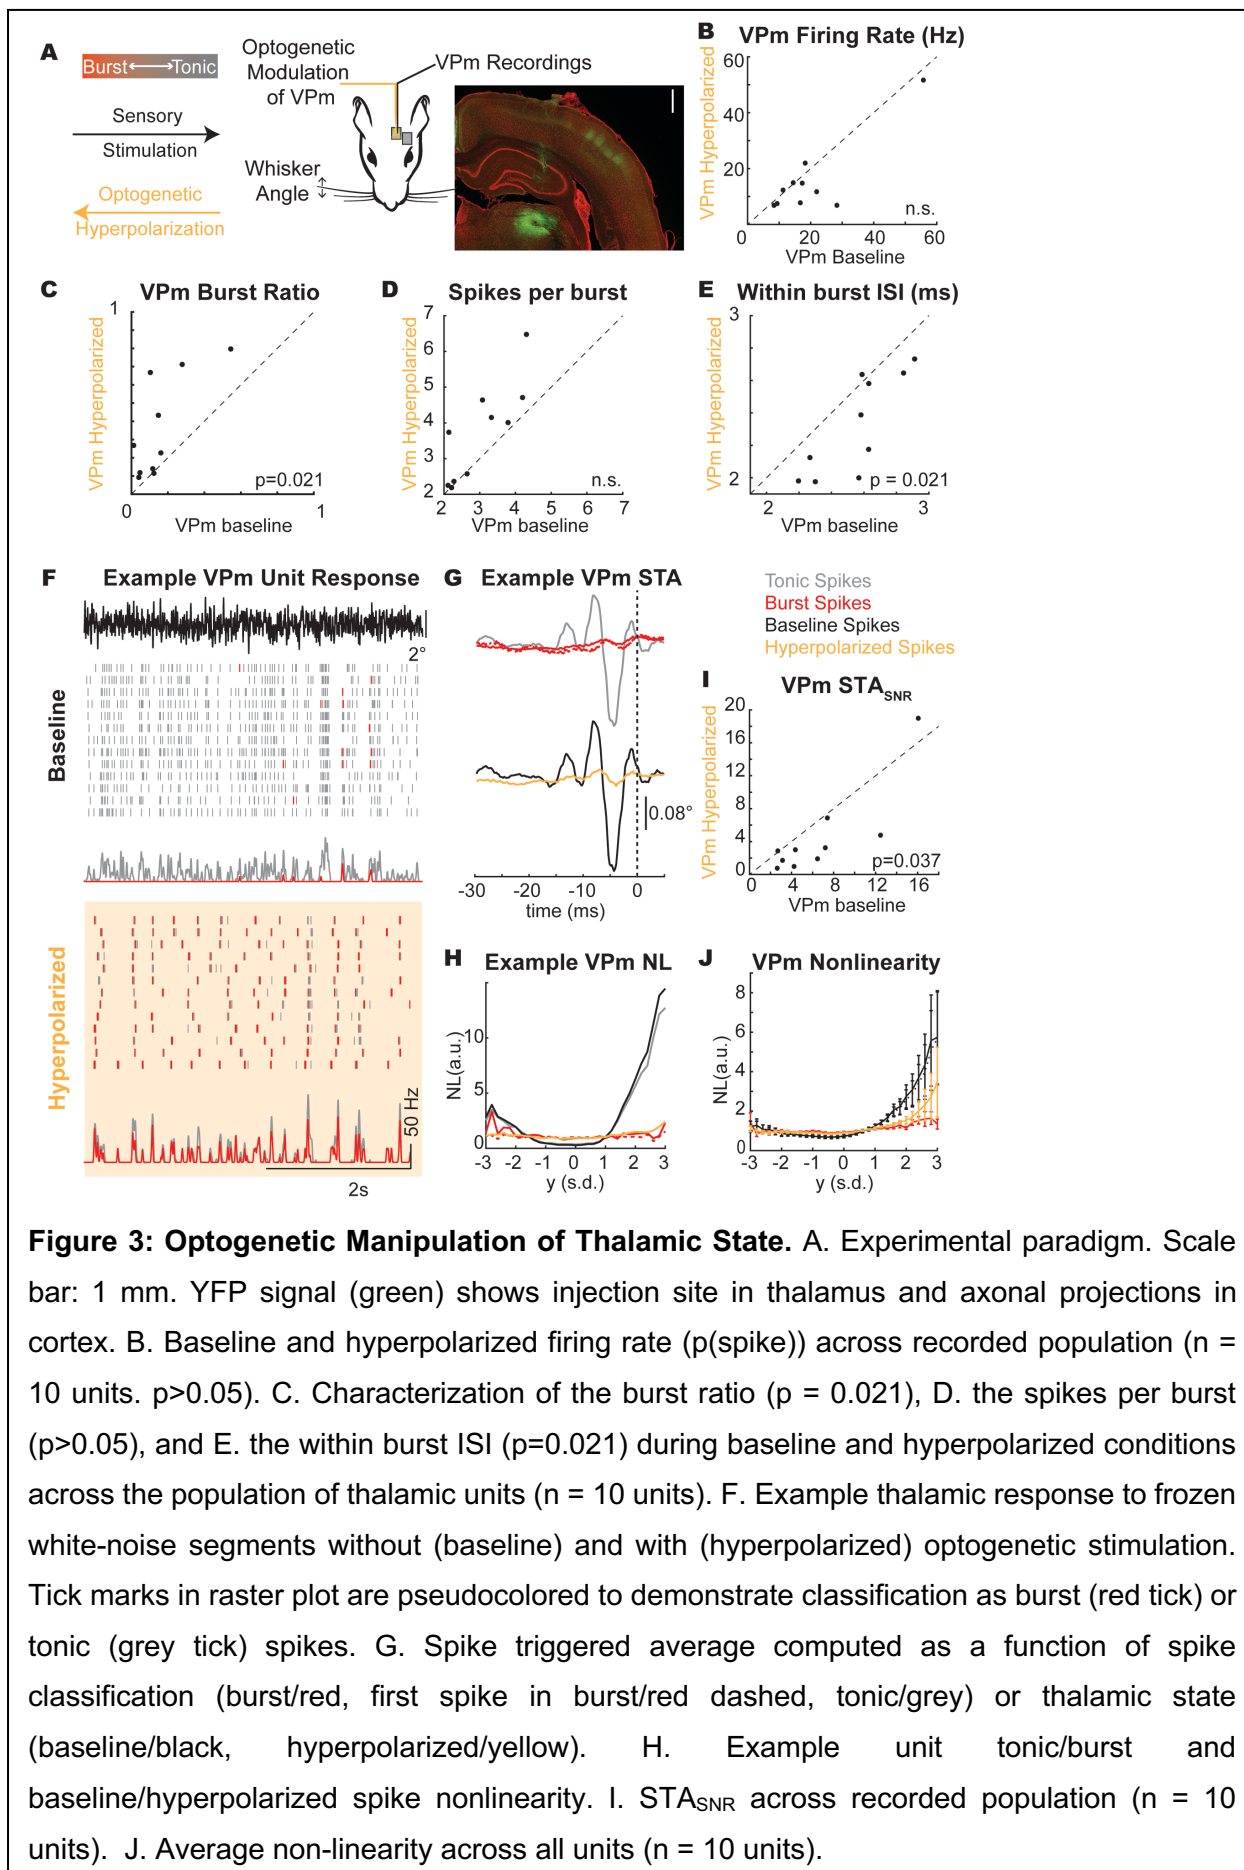

## 379 Temporal precision of thalamic firing modes

380           Given the difference between the recovered estimates of burst/hyperpolarized and  
381 tonic/baseline feature selectivity and the implications for timing precision in the thalamocortical  
382 circuit, we implemented a series of computational controls to identify any potential  
383 shortcomings of the methodologies that could underlie these results.

384           The first issue we considered was the overall difference in spike rates. Spike triggered  
385 analyses require a large number of spikes to effectively estimate the underlying selectivity.  
386 The proportion of spikes classified as bursts was lower than the spikes classified as tonic  
387 (Figure 2F) as quantified by the burst and tonic firing rate. Therefore, it was possible that we  
388 could not recover an STA for the burst spike condition due to the reduced number of burst  
389 spikes relative to tonic spikes. In an example unit, we computed the tSTA using only a subset  
390 of the spikes ( $n = 2363$  of 36558 spikes corresponding to  $n = 2363$  bursts with  $n = 7547$  burst  
391 spikes) and found that the linear filter was essentially identical to the tSTA (Figure 2B, grey  
392 dashed line). We computed this for all thalamic units and again found that the burst-count  
393 matched tSTA was also significantly larger than the bSTA. Furthermore, there was no  
394 statistically significant difference in the firing rate between the baseline and hyperpolarized  
395 optogenetic conditions (Figure 3G), but still the difference in the STA persisted. This suggests  
396 that simple spike counts alone were insufficient to explain the difference in the tonic/baseline  
397 STA and the burst/hyperpolarized STA.

398           The second issue we considered was the inherent assumption that the feature  
399 selectivity for each unit could be recovered as the STA. It was possible that the burst STA was  
400 not recoverable because the burst firing mode was better estimated by a symmetric  
401 nonlinearity and therefore the filter could only be recovered using spike triggered covariance  
402 (STC) techniques. The STC approach has been previously implemented in the vibrissa  
403 pathway (Estebanez et al., 2012; Maravall et al., 2007; Petersen et al., 2008), revealing  
404 potential feature selectivity not captured with STA in some conditions, and was therefore  
405 important to consider here. We therefore computed the STC for all recorded thalamic units

406 and compared this for each spiking condition. Although the dataset was more limited because  
407 the number of units with a significant STC filter was lower than those with a significant STA  
408 filter ( $n = 13$  units with STC filter compared to  $n = 30$  units with STA filter), the same trends  
409 regarding the reduction in the amplitude of the filter ( $STC_{SNR}$ ) and the slope of the symmetric  
410 nonlinearity persisted (as described in results). Therefore, this suggests that the method of  
411 extracting the feature selectivity (STA compared to STC) was insufficient to explain the inability  
412 to estimate the feature selectivity in the hyperpolarized/burst spiking conditions. However, it is  
413 also possible that the feature selectivity for a given neuron shifts to a higher-order space as  
414 firing modes transition from tonic to burst firing. If the burst firing could be associated with  
415 higher-order structure in the sensory stimulus, it may only be revealed using STC analysis.  
416 We thus conducted a STC analysis of the recorded neurons. First, we found that the tonic  
417  $STA_{SNR}$  was significantly larger than the burst  $STC_{SNR}$  ( $p = 3e-6$ ), suggesting that the feature  
418 selectivity did not simply shift from the first order estimate of the STA to higher order  
419 representations captured by the STC. Then we assessed the probability that a unit with a  
420 significant filter, as assessed using STA, also showed a significant filter, as assessed using  
421 STC. We found that all 13 units with significant filters also showed significant STA filters. This  
422 emphasizes the complexity of the stimulus representation, but further underscores that the  
423 stimulus representation did not simply shift from tonic to burst firing. Therefore, this analysis  
424 revealed that in general the high-order structure captured by STC was insignificant compared  
425 to the first order structure revealed by STA, and that when there was a loss of structure in the  
426 STA in the burst mode of firing, no new higher-order feature selectivity emerged through the  
427 STC analysis.

428         The third assumption made throughout the analysis was that burst spikes are actually  
429 driven by sensory stimuli such that there is a recoverable burst spike feature selectivity. The  
430 alternative explanation would be that burst spikes are not feature selective and instead occur  
431 randomly due to intrinsic or other non-sensory processes. To assess this, we quantified the  
432 trial-to-trial repeatability for bursts in response to frozen white-noise segments. As can be seen

433 in Figure 3B, the qualitative assessment of temporally aligned bursts in response to the frozen  
434 white-noise segment suggests that the bursts are driven by the sensory stimulus in a  
435 repeatable way. For units with a sufficient number of repeated trials, we computed the  
436 reliability of the burst spiking as the correlation between the peristimulus time histogram of  
437 even and odd trials in response to the frozen white-noise segment. We found that all units  
438 showed greater reliability than what is expected based on just the temporal correlations in the  
439 burst spiking (shuffle control,  $p = 0.002$ ,  $n = 10$  thalamic units). This suggests that the bursts  
440 are not randomly generated or due entirely to a non-stimulus related phenomenon.

441 From these controls, we propose that the difference in the spike triggered encoding  
442 properties could not be attributed to differences in the overall spike rates, the temporal  
443 properties of the spikes within the burst, or the mechanism of filter estimation. Instead, we  
444 propose that the burst spikes are driven by the sensory stimulus and have an underlying  
445 feature selectivity, but that this cannot be recovered using spike triggered techniques due to  
446 the reduced temporal precision of burst spiking relative to tonic spikes.

447 Recovering feature selectivity from spike-triggered analysis relies on precise temporal  
448 spiking relative to the sensory stimulus. To simulate degradation of the spike timing precision,  
449 we added independent samples of normally distributed temporal jitter of varying amplitudes  
450 (standard deviation of the jitter distribution) to each tonic spike for an example unit and  
451 computed the STA (Figure 4A). Across units, we quantified the degradation of the STA as the  
452 jittered- $STA_{SNR}$  normalized by the  $tSTA_{SNR}$  (0 ms jitter). The jittered- $STA_{SNR}$  (black) is within  
453 the band expected for the  $bSTA_{SNR}$  with the addition of 4 milliseconds of jitter to the spike  
454 times (red shaded, Figure 4A, right). We propose that the effects of temporal jitter are  
455 particularly evident for whisker selectivity, presumably due to the short temporal duration of  
456 the filters (approximately 10-15 milliseconds in duration, Figure 1F).

457 Given the marked effects of jitter on the ability to recover the STA, we investigated the  
458 variability in the spike timing relative to the noise stimulus (Figure 4B). For this example unit,  
459 we have identified a segment in the noise stimulus that closely resembles the tonic STA for



460 this unit and elicits a reliable spiking response (Figure 4B, top; stimulus – black, tSTA – grey  
461 dashed). The vertical dashed line indicates the spike time for the spike triggered average ( $t_0$ )  
462 with the grey bar indicating the duration of the STA. If there was no variability in the neural  
463 spiking, the raster plots would all be perfectly aligned to  $t_0$  because the similarity between the  
464 stimulus and the STA would predict a spiking response at that time point. However, the timing  
465 of evoked neural responses is always variable to some extent and this can be visualized for  
466 this example response segment as the temporal variability of the spike times surrounding this  
467 stimulus feature in the noise stimulus (Figure 4B, as indicated by the grey stimulus bars that  
468 extend from the first spike response to this particular sensory feature). For this example  
469 snapshot, it is also apparent that the burst spikes in the hyperpolarized condition show greater  
470 temporal variability than the tonic spikes in the baseline condition.

471 To quantify this jitter across all spikes, we developed a  $T_{\text{jitter}}$  metric that determines the  
472 time lag of the peak correlation between the STA and the stimulus segment ( $s(t_j)$ ) surrounding  
473 each spike (Figure 4C). Intuitively, this is a correlative method to identify the time lag between  
474 when we predict a spike is most likely to occur based on the STA and the stimulus (peak  
475 correlation) and when the spike actually occurred. For this analysis, we treated the tSTA as  
476 the true feature selectivity of the neuron across all spiking conditions because we could not  
477 recover a reliable estimate of the bSTA.

478 We computed  $T_{\text{jitter}}$  for each spike and plotted  $T_{\text{jitter}}$  distributions for each spike condition  
479 (tonic, burst, baseline, hyperpolarized). If a neuron was infinitely precise such that when the  
480 stimulus matched the spike triggered average, the neuron fired a spike without delay, this  
481 distribution would be represented by a delta function at  $T_{\text{jitter}}$  equals zero. As the variability of  
482 the timing increases, the width of this distribution will also increase. For the tonic and baseline  
483 condition spikes, we found a clear peak in  $T_{\text{jitter}}$  values at  $T_{\text{jitter}}$  equals zero (Figure 4C, grey,  
484 black). For the burst and hyperpolarized condition spikes, we observe little-to-no peak in the  
485  $T_{\text{jitter}}$  metric at zero (Figure 4C, red, yellow). We computed the  $T_{\text{jitter}}$  distribution across all  
486 thalamic units and found that the tonic and baseline spikes had higher peaks at  $T_{\text{jitter}}$  equals

487 zero than the burst and hyperpolarized spike conditions (Figure 4D). We quantified this  
488 statistically by computing a precision metric (Figure 4C) that computes the proportion of spikes  
489 within  $\pm 1$  millisecond of  $T_{\text{jitter}}$  equals zero (Figure 4E). The tonic and baseline spike condition  
490 were more precise than burst and hyperpolarized conditions.

491         These data suggest that tonic spikes showed greater temporal precision in response  
492 to the sensory white-noise than burst spikes and that this could underlie the difference in the  
493 recoverability of the feature selectivity in the thalamus between firing modes. It is well  
494 established that the timing of sensory inputs is particularly important in the thalamocortical  
495 circuit such that changes in thalamic spike timing could have large impacts on the downstream  
496 representation of sensory information in the cortex. Next, we investigated how these changes  
497 in temporal precision in optogenetically modulated thalamic states impact cortical encoding  
498 properties.

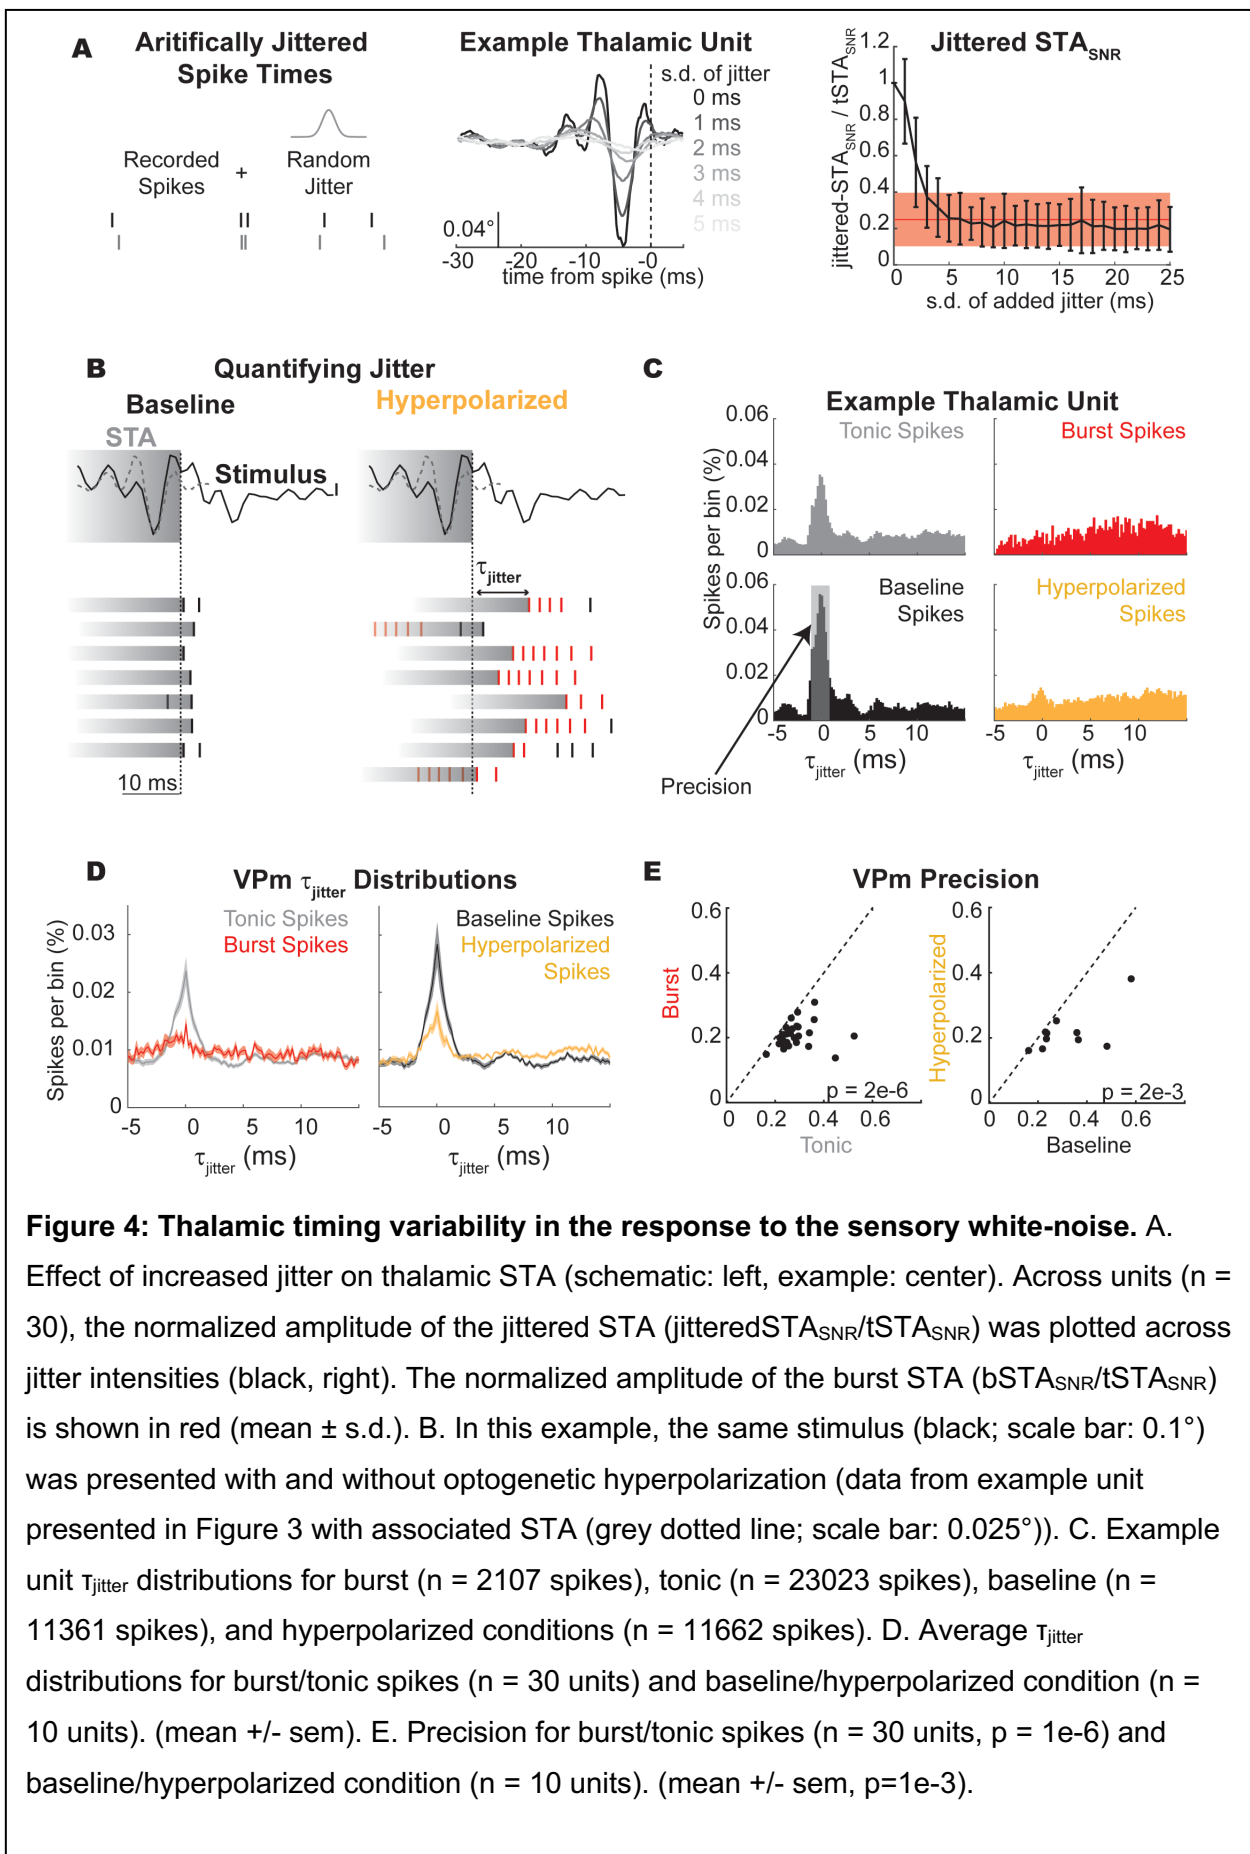

500 Optogenetic modulation of thalamic firing modes directly impacts cortical representation of  
501 sensory information.

502 Cortical neurons that receive direct thalamic input are integrating information over a  
503 population of thalamocortical neurons that can be exhibiting different firing characteristics.  
504 This makes it difficult to determine the impact of a single burst from a single neuron on  
505 information representation in the pathway. Instead, we used the optogenetic manipulation of  
506 thalamic state as presented in Figure 3 to bias the activity of the thalamic population towards  
507 burst firing (hyperpolarized condition) while recording the cortical activity extracellularly  
508 (Figure 5A).

509 For an example unit, we have plotted the cortical STA in the baseline and  
510 hyperpolarized VPM conditions (Figure 5B). Here, the amplitude of the cortical STA was  
511 smaller when the thalamus is hyperpolarized compared to when it is not (Figure 5B). This  
512 cortical unit also shows a reduced tuning to the STA when the thalamus was hyperpolarized  
513 (Figure 5C). Across the population of recorded cortical neurons, the same effect seen in this  
514 example neuron of a reduced  $STA_{SNR}$  when the VPM was hyperpolarized compared to when  
515 it was not (Figure 5D) and a reduction in the tuning was present across all cortical units as  
516 quantified by the spiking nonlinearity (Figure 5E). These findings mirror what was seen for  
517 thalamic neurons when comparing the baseline and the optogenetically manipulated  
518 conditions demonstrating that the changes in thalamic encoding properties are propagated to  
519 cortex. Note that we again conducted the STC analysis with the S1 neurons and found the  
520 same reduction in  $STC_{SNR}$  when the VPM was hyperpolarized compared to when it was not ( $p$   
521  $= 9e-5$ ), suggesting that the loss of feature selectivity in S1 with thalamic hyperpolarization  
522 was not just due to the transfer of feature selectivity to higher-order characteristics.

523 Interestingly, there was no significant difference in the sensory white-noise-evoked  
524 firing rate in the cortex as a function of the VPM condition (Figure 5F). This suggests that it  
525 was not overall spike counts influencing the cortical feature selectivity. Instead, we propose  
526 the temporal jitter in the thalamic spiking patterns propagated to cortex. We investigated the

527 temporal precision of the cortical spiking in response to the sensory white-noise using the  
528 same methodology employed for the thalamus. As we saw for the thalamus, the cortical spikes  
529 from this example unit also showed greater temporal precision in response to white-noise  
530 whisker stimulation in the baseline VPm condition compared to the hyperpolarized VPm  
531 condition (Figure 5G) as evidenced by the peak in the  $T_{\text{jitter}}$  distribution around  $T_{\text{jitter}}$  equals zero.  
532 This effect was consistent across the population of recorded cortical units (Figure 5H) and  
533 showed significant differences in the precision of the cortical firing (Figure 5I). This suggests  
534 that the temporal jitter present in the thalamus is transmitted to the cortex where it also impacts  
535 the representation of sensory information.

536

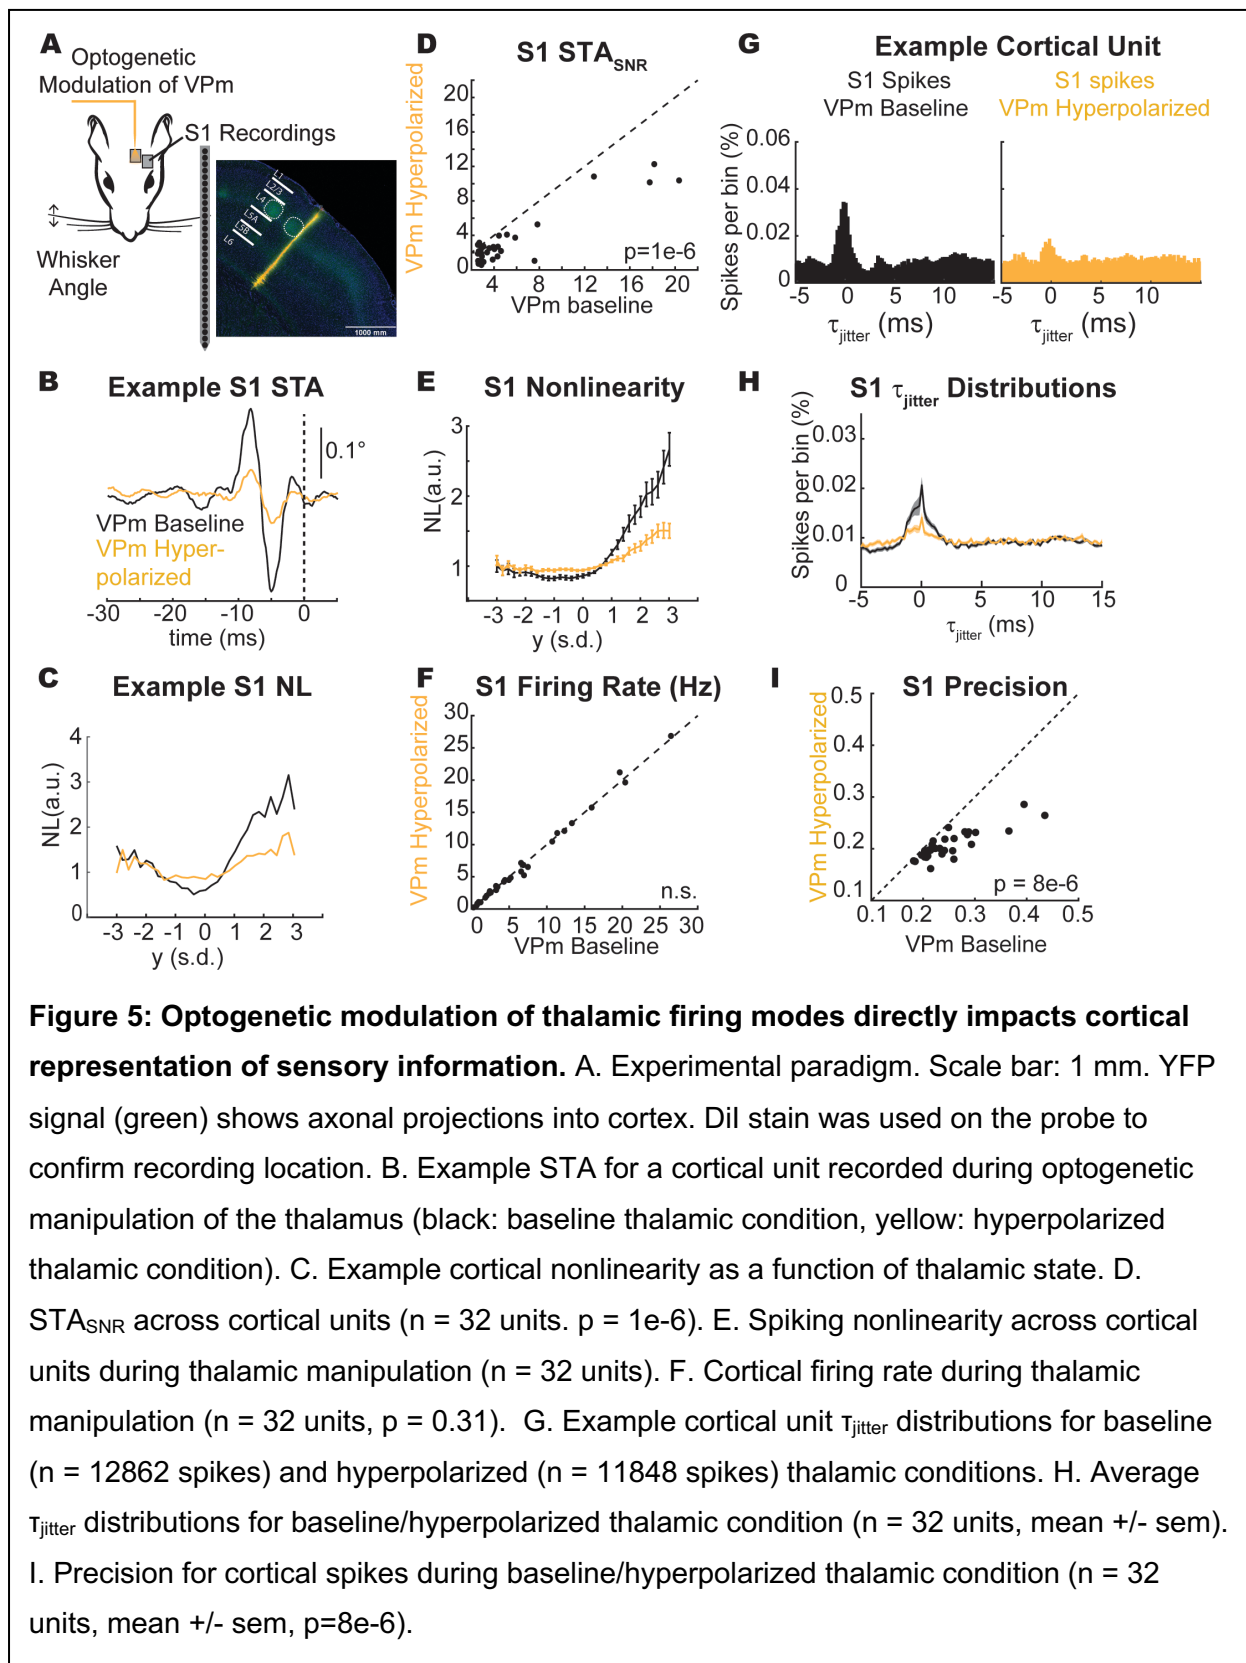

537

538

539

## 540 **Discussion**

541           Although there have been extensive investigations into the cortical state-dependent  
542 processing of the thalamocortical circuit, we know surprisingly little about how information is  
543 processed in a thalamic state-dependent manner. Here, using a combination of optogenetic  
544 manipulation and electrophysiological recording techniques, we have performed a series of  
545 experiments modulating the state of the thalamus (through constant optogenetic  
546 hyperpolarization) and quantified the effects on encoding in the thalamocortical circuit. Using  
547 this technique, we have coarse control of the firing mode in thalamus without altering the  
548 processing occurring from the whisker to thalamus, enabling us to decouple the changes in  
549 thalamic firing mode on thalamocortical processing from changes occurring in subthalamic  
550 processing. We found that, unlike the visual pathway, the feature selectivity of burst spikes in  
551 the vibrissa pathway could not be recovered using spike triggered techniques due to increased  
552 burst spike timing variability (loss of timing precision) relative to tonic spike timing. Recordings  
553 from barrel cortex during optogenetic manipulation of thalamic state demonstrated a loss in  
554 the temporal precision of the cortical spiking that also led to a degradation of the recovered  
555 feature selectivity. This suggests that bursts in the whisker pathway are less precise than tonic  
556 spikes during ongoing weak sensory stimulation and that this loss of temporal precision is  
557 propagated to cortex, which could have implications for the integration of complex patterns of  
558 sensory inputs.

559           Although spike-triggered analysis has been widely applied in various pathways, there  
560 have been comparatively few studies of this nature in the vibrissa pathway despite the  
561 extensive utilization of this model system. In this study, we focused primarily on timing in the  
562 thalamocortical circuit, and used the spike-triggered analysis as a vehicle to probe this issue  
563 rather than uncovering novel aspects of feature selectivity related to whisker kinematics.  
564 Nevertheless, it is important to note the similarities and differences between these studies.  
565 Spike-triggered averaging of VPM neurons in a study from Petersen et al. revealed very similar  
566 feature selectivity to what we report for VPM in baseline conditions here, with spiking tending

567 to be preceded by a very fast transient, biphasic whisker deflection (Petersen et al., 2008).  
568 Studies in cortex, however, reveal more complex properties. Although the basic feature  
569 selectivity that we uncovered for S1 neurons in baseline conditions using STA was very similar  
570 to what has been observed in a subset of recorded neurons in other cortical studies  
571 (Estebanez et al., 2012; Maravall et al., 2007), further analysis using STC as well as more  
572 complex whisker stimulation paradigms in these studies identified more complex encoding  
573 properties. It should be noted that we restricted analysis to cortical S1 neurons that exhibited  
574 significant feature selectivity in the baseline condition with STA, but also observed other  
575 cortical neurons that showed significant feature selectivity only using STC, consistent with  
576 these previous studies. For these neurons, the filters recovered using STC analysis for tonic  
577 spikes were lost when they were computed for burst spikes, as the STC analysis is also reliant  
578 on precise spike-timing relative to the sensory stimulus.

579         Specific to our findings here related to thalamic firing modes, it is theoretically possible  
580 that in the optogenetically induced thalamic burst mode, the feature selectivity is not lost, but  
581 instead transformed to a type of selectivity that is not captured through the simple  
582 characteristics of the spike-triggered averaging or a stimulus selectivity that is fundamentally  
583 different from the tonic spike feature selectivity. As described above, previous studies have  
584 utilized STC analysis to successfully uncover complex feature selectivity in the visual (Touryan  
585 et al., 2005) and somatosensory (Estebanez et al., 2012; Maravall et al., 2007) pathways.  
586 However, when we extended the analysis here to the spike-triggered covariance (STC), it was  
587 not the case that the timing changes were captured through covariance analysis. For both the  
588 thalamic VPM and cortical S1 recordings, there was no apparent shift in feature selectivity  
589 from first-order structure (STA) to higher-order structure (STC) with a change in thalamic firing  
590 mode or state. Units with significant filters in the tonic spiking condition did not show significant  
591 filters in the burst spiking condition, even when assessed using both STA and STC. As with  
592 the spike triggered analysis, further analysis to explore burst feature selectivity that is  
593 fundamentally different from the tonic feature selectivity could not be pursued due to the timing



594 variability of the spiking. We cannot identify this selectivity without a mechanism to measure,  
595 and compensate for, the increased spike timing jitter, as this framework is inextricably linked  
596 to the timing precision with which neurons spike relative to the sensory input.

597         These results could be interpreted as consistent with the view that bursts are not  
598 representing detailed stimulus information. However, there is evidence that bursts may convey  
599 more information than the “all-or-none” presence or absence of a burst through inter-burst  
600 spike timing and the number of spikes per burst (Mease et al., 2017), suggesting a role of  
601 temporally precise burst firing in information representation. Furthermore, thalamic bursting  
602 can be temporally precise within and across neurons in response to high intensity whisker  
603 stimuli (Whitmire et al., 2016). Instead, we propose that the temporal precision of the thalamic  
604 firing is a function of both the state of the thalamus and the intensity of the sensory stimulus.  
605 It has previously been shown that the temporal precision of thalamic encoding increases with  
606 the intensity of the sensory stimulus (Desbordes et al., 2008; Whitmire et al., 2016) while here  
607 we have shown that the temporal precision of the thalamic firing decreases with sustained  
608 hyperpolarization, which would naturally have implications for what signals do and do not get  
609 conveyed through the relatively narrow cortical window of integration (Gabernet et al., 2005).  
610 These two competing factors would enable the burst firing mode to encode high amplitude  
611 stimuli in a temporally precise fashion while low amplitude stimuli, such as the sensory white-  
612 noise presented here, would not be able to overcome the variability present in the burst state.

613         There are multiple mechanisms that could underlie the reduced temporal precision in  
614 the burst firing mode including variability introduced by the slow dynamics of the calcium  
615 depolarization, increased variability in the time to reach threshold due to the prolonged  
616 hyperpolarization of the baseline polarization, as well as potential changes in the integration  
617 properties of the thalamic neurons. Furthermore, these mechanisms could occur  
618 independently such that the variability across neurons is uncorrelated or these mechanisms  
619 could be coordinated in some way to enable correlated variability across the thalamic  
620 population. Both coordinated and uncoordinated jitter would have a detrimental effect on the

621 ability to recover the STA because either the spike timing would no longer be locked to the  
622 stimulus itself or the input to the cortex would be temporally imprecise. However, coordinated  
623 jitter would maintain the information about the stimulus while uncoordinated jitter would  
624 degrade the recoverability of the stimulus features with the spike-triggered approach. Future  
625 work is needed to investigate the jitter in the burst spiking across the population to determine  
626 whether or not the variability in the spike timing is coordinated across thalamic units in this  
627 context.

628 While we have primarily considered thalamic state-dependent encoding as a  
629 feedforward representation from thalamus to cortex, the highly interconnected thalamocortical  
630 circuitry shapes coding properties in both feedforward and feedback manner. Changes in  
631 thalamic activity impact cortical activity which then provides feedback to thalamus to further  
632 alter activity (Crandall et al., 2015; Mease et al., 2014; Poulet et al., 2012; Reinhold et al.,  
633 2015; Wimmer et al., 2015). It is possible for thalamus to influence cortical state and for the  
634 cortex to influence thalamic state, but how this plays out during natural behaviors is not yet  
635 known and must be decoupled using more sophisticated techniques such as closed-loop  
636 control of neural activity (Bolus et al., 2018; Newman et al., 2015).

637 Given the importance of thalamic spike timing precision within and across neurons in  
638 transmitting information downstream to cortex (Bruno and Sakmann, 2006; Wang et al., 2010),  
639 alterations to thalamic state can shape multiple properties of the spiking inputs to cortex. Here,  
640 we have shown that thalamic state directly impacts the spike timing precision in the thalamus  
641 and cortex. Manipulation of the thalamic state can also lead to changes in the stimulus evoked  
642 cortical dynamics (Whitmire et al., 2017) and spatiotemporal cortical activation (Borden et al.,  
643 2019). Alterations to the state of the thalamus, or the baseline membrane potential, provides  
644 a biophysical mechanism for the thalamus to gate information flow to cortex. Furthermore, this  
645 mechanism could be under both feedforward and feedback control. This sets the stage for a  
646 dynamic interaction between thalamic and cortical states to drive highly interactive patterns of

647 neural activity, ultimately controlling the integration of afferent signaling that underlies sensory  
648 percepts.

649 **References**

- 650 Alitto HJ, Weyand T, Usrey WM. 2005. Distinct Properties of Stimulus-Evoked Bursts in the  
651 Lateral Geniculate Nucleus. *J Neurosci* **25**:514–523. doi:10.1523/JNEUROSCI.3369-  
652 04.2005
- 653 Bolus MF, Willats AA, Whitmire CJ, Rozell CJ, Stanley GB. 2018. Design strategies for  
654 dynamic closed-loop optogenetic neurocontrol in vivo. *J Neural Eng* **15**:026011.  
655 doi:10.1088/1741-2552/aaa506
- 656 Borden PY, Wright NC, Sederberg AJ, Waiblinger C, Haider B, Stanley GB. 2019. Thalamic  
657 modulation and the shaping of cortical sensory representations in the awake and  
658 anesthetized mouse2019 Neuroscience Meeting Planner. Chicago, IL: Society for  
659 Neuroscience. p. Program No. 221.19.
- 660 Bruno RM, Sakmann B. 2006. Cortex is driven by weak but synchronously active  
661 thalamocortical synapses. *Science* **312**:1622–7. doi:10.1126/science.1124593
- 662 Butts D a, Weng C, Jin J, Yeh C-I, Lesica NA, Alonso J-M, Stanley GB. 2007. Temporal  
663 precision in the neural code and the timescales of natural vision. *Nature* **449**:92–5.  
664 doi:10.1038/nature06105
- 665 Castro-alamancos MA. 2002. Properties of primary sensory (lemniscal) synapses in the  
666 ventrobasal thalamus and the relay of high-frequency sensory inputs. *J Neurophysiol*  
667 **94**:946–953.
- 668 Crandall SR, Cruikshank SJ, Connors BW, Crandall SR, Cruikshank SJ, Connors BW. 2015.  
669 A Corticothalamic Switch: Controlling the Thalamus with Dynamic Synapses. *Neuron*  
670 **86**:1–15. doi:10.1016/j.neuron.2015.03.040
- 671 Denning KS, Reinagel P. 2005. Visual Control of Burst Priming in the Anesthetized Lateral  
672 Geniculate Nucleus. *J Neurosci* **25**:3531–3538. doi:10.1523/JNEUROSCI.4417-  
673 04.2005

- 674 Desbordes G, Jin J, Weng C, Lesica NA, Stanley GB, Alonso J. 2008. Timing precision in  
675 population coding of natural scenes in the early visual system. *PLoS Biol* **6**:e324.  
676 doi:10.1371/journal.pbio.0060324
- 677 Eggermont JJ, Johannesma PIM, Aertsen AMH. 1983. Reverse correlation methods in  
678 auditory research. *Q Rev Biophys* **16**:341–414. doi:10.1017/S0033583500005126
- 679 Estebanez L, Boustani S EI, Destexhe A, Shulz DE. 2012. Correlated input reveals  
680 coexisting coding schemes in a sensory cortex. *Nat Neurosci* **15**:1–14.  
681 doi:10.1038/nn.3258
- 682 Gabernet L, Jadhav SP, Feldman DE, Carandini M, Scanziani M. 2005. Somatosensory  
683 integration controlled by dynamic thalamocortical feed-forward inhibition. *Neuron*  
684 **48**:315–27. doi:10.1016/j.neuron.2005.09.022
- 685 Guido W, Weyand T. 1995. Burst responses in thalamic relay cells of the awake behaving  
686 cat. *J Neurophysiol* **74**:1782–1786.
- 687 Jones JP, Palmer LA. 1987. The two-dimensional spatial structure of simple receptive fields  
688 in cat striate cortex. *J Neurophysiol* **58**:1187–211.
- 689 Lesica NA, Jin J, Weng C, Yeh C-I, Butts D a, Stanley GB, Alonso J-M. 2007. Adaptation to  
690 stimulus contrast and correlations during natural visual stimulation. *Neuron* **55**:479–91.  
691 doi:10.1016/j.neuron.2007.07.013
- 692 Lesica NA, Stanley GB. 2004. Encoding of natural scene movies by tonic and burst spikes in  
693 the lateral geniculate nucleus. *J Neurosci* **24**:10731–40.  
694 doi:10.1523/JNEUROSCI.3059-04.2004
- 695 Maravall M, Petersen RS, Fairhall AL, Arabzadeh E, Diamond ME. 2007. Shifts in coding  
696 properties and maintenance of information transmission during adaptation in barrel  
697 cortex. *PLoS Biol* **5**:e19. doi:10.1371/journal.pbio.0050019
- 698 Martinez-Conde S, Macknik SL, Hubel DH. 2002. The function of bursts of spikes during

- 699 visual fixation in the awake primate lateral geniculate nucleus and primary visual cortex.  
700 *Proc Natl Acad Sci* **99**:13920–13925. doi:10.1073/pnas.212500599
- 701 McFarland JM, Cui Y, Butts D a. 2013. Inferring nonlinear neuronal computation based on  
702 physiologically plausible inputs. *PLoS Comput Biol* **9**:e1003143.  
703 doi:10.1371/journal.pcbi.1003143
- 704 Mease RA, Krieger P, Groh A. 2014. Cortical control of adaptation and sensory relay mode  
705 in the thalamus. *Proc Natl Acad Sci U S A* **111**:6798–803.  
706 doi:10.1073/pnas.1318665111
- 707 Mease RA, Kuner T, Fairhall AL, Groh A. 2017. Multiplexed Spike Coding and Adaptation in  
708 the Thalamus. *Cell Rep* **19**:1130–1140. doi:10.1016/j.celrep.2017.04.050
- 709 Newman JP, Fong M-F, Millard DC, Whitmire CJ, Stanley GB, Potter SM. 2015. Optogenetic  
710 feedback control of neural activity. *Elife* 1–24. doi:10.7554/eLife.07192
- 711 Petersen RS, Brambilla M, Bale MR, Alenda A, Panzeri S, Montemurro M a, Maravall M.  
712 2008. Diverse and temporally precise kinetic feature selectivity in the VPM thalamic  
713 nucleus. *Neuron* **60**:890–903. doi:10.1016/j.neuron.2008.09.041
- 714 Poulet JFA, Fernandez LMJ, Crochet S, Petersen CCHH. 2012. Thalamic control of cortical  
715 states. *Nat Neurosci* **15**:370–2. doi:10.1038/nn.3035
- 716 Quiroga RQ, Nadasdy Z, Ben-Shaul Y. 2004. Unsupervised spike detection and sorting with  
717 wavelets and superparamagnetic clustering. *Neural Comput* **16**:1661–1687.  
718 doi:10.1162/089976604774201631
- 719 Ramirez A, Pnevmatikakis E, Merel J, Paninski L, Miller KD, Bruno RM. 2014. The  
720 spatiotemporal receptive fields of barrel cortex neurons revealed by reverse correlation  
721 of synaptic input. *Nat Neurosci* **17**:866–875.
- 722 Reid RC, Alonso J-M. 1995. Specificity of monosynaptic connections from thalamus to visual  
723 cortex. *Nature* **378**:281–4. doi:10.1038/378281a0

- 724 Reinagel P, Godwin D, Sherman SM, Koch C. 1999. Encoding of visual information by LGN  
725 bursts. *J Neurophysiol* 2558–2569.
- 726 Reinhold K, Lien AD, Scanziani M. 2015. Distinct recurrent versus afferent dynamics in  
727 cortical visual processing. *Nat Neurosci* **18**. doi:10.1038/nn.4153
- 728 Rossant C, Kadir SN, Goodman DFM, Schulman J, Belluscio M, Buzsáki G, Harris KD,  
729 Hunter MLD, Saleem AB, Grosmark A, Denfield GH, Ecker ASS, Tolias AS, Solomon  
730 SG, Carandini M, Belluscio M, Denfield GH, Ecker ASS, Tolias AS, Solomon SG,  
731 Buzsáki G, Carandini M, Harris KD. 2015. Spike sorting for large, dense electrode  
732 arrays. *Nat Neurosci* 015198. doi:10.1038/nn.4268
- 733 Schwartz O, Pillow JW, Rust NC, Simoncelli EP. 2006. Spike-triggered neural  
734 characterization. *J Vis* **6**:484–507. doi:10.1167/6.4.13
- 735 Sherman SM. 2001. A wake-up call from the thalamus. *Nat Neurosci* **4**:344–6.  
736 doi:10.1038/85973
- 737 Stanley GB. 2002. Adaptive spatiotemporal receptive field estimation in the visual pathway.  
738 *Neural Comput* **14**:2925–2946. doi:10.1162/089976602760805340
- 739 Suzuki S, Rogawski MA. 1989. T-type calcium channels mediate the transition between tonic  
740 and phasic firing in thalamic neurons. *Proc Natl Acad Sci U S A* **86**:7228–7232.  
741 doi:10.1073/pnas.86.18.7228
- 742 Swadlow HA, Gusev AG. 2001. The impact of “bursting” thalamic impulses at a neocortical  
743 synapse. *Nat Neurosci* **4**:402–8. doi:10.1038/86054
- 744 Theunissen FE, Sen K, Doupe AJJ. 2000. Spectral-temporal receptive fields of nonlinear  
745 auditory neurons obtained using natural sounds. *J Neurosci* **20**:2315–2331.
- 746 Touryan J, Felsen G, Dan Y. 2005. Spatial structure of complex cell receptive fields  
747 measured with natural images. *Neuron* **45**:781–91. doi:10.1016/j.neuron.2005.01.029
- 748 Wang Q, Webber RM, Stanley GB. 2010. Thalamic synchrony and the adaptive gating of

- 749 information flow to cortex. *Nat Neurosci* **13**:1534–41. doi:10.1038/nn.2670
- 750 Wang X, Wei Y, Vaingankar V, Wang Q, Koepsell K, Sommer FT, Hirsch J a. 2007.  
751 Feedforward Excitation and Inhibition Evoke Dual Modes of Firing in the Cat's Visual  
752 Thalamus during Naturalistic Viewing. *Neuron* **55**:465–478.  
753 doi:10.1016/j.neuron.2007.06.039
- 754 Whitmire CJ, Millard DC, Stanley GB. 2017. Thalamic state control of cortical paired-pulse  
755 dynamics. *J Neurophysiol* **117**:jn 00415 2016. doi:10.1152/jn.00415.2016
- 756 Whitmire CJ, Waiblinger C, Schwarz C, Stanley GB. 2016. Information Coding through  
757 Adaptive Gating of Synchronized Thalamic Bursting. *CellReports* **14**:1–13.  
758 doi:10.1016/j.celrep.2015.12.068
- 759 Wimmer RD, Schmitt LI, Davidson TJ, Nakajima M, Deisseroth K, Halassa MM. 2015.  
760 Thalamic control of sensory selection in divided attention. *Nature*.  
761 doi:10.1038/nature15398
- 762 Wolfart J, Debay D, Le Masson G, Destexhe A, Bal T. 2005. Synaptic background activity  
763 controls spike transfer from thalamus to cortex. *Nat Neurosci* **8**:1760–7.  
764 doi:10.1038/nn1591
- 765
